# Supplementary material
Source: publisher figshare collection journal article supplement (https://acs.figshare.com/ndownloader/files/18727412)
Supplement: Supplementary file 1 [file 18727412]

## Supporting Information

### Fabrication of 2D NiO porous nanosheets with superior lithium storage performance via a facile thermal-decomposition method

Yuanyuan Zheng <sup>a,b</sup>, Yanwei Li<sup>\*a</sup>, Renshu Huang <sup>a</sup>, Yu Huang, Jinhuan Yao <sup>\*a</sup>, Bin Huang <sup>a</sup>,  
Amare Aregahegn Dubale <sup>b</sup>

<sup>a</sup> Guangxi Key Laboratory of Electrochemical and Magneto-chemical Functional Materials, College of Chemistry and Bioengineering, Guilin University of Technology, Guilin, 541004, China

<sup>b</sup> School of Material Science and Engineering, Sun Yat-sen University, Guangzhou, 510006, China

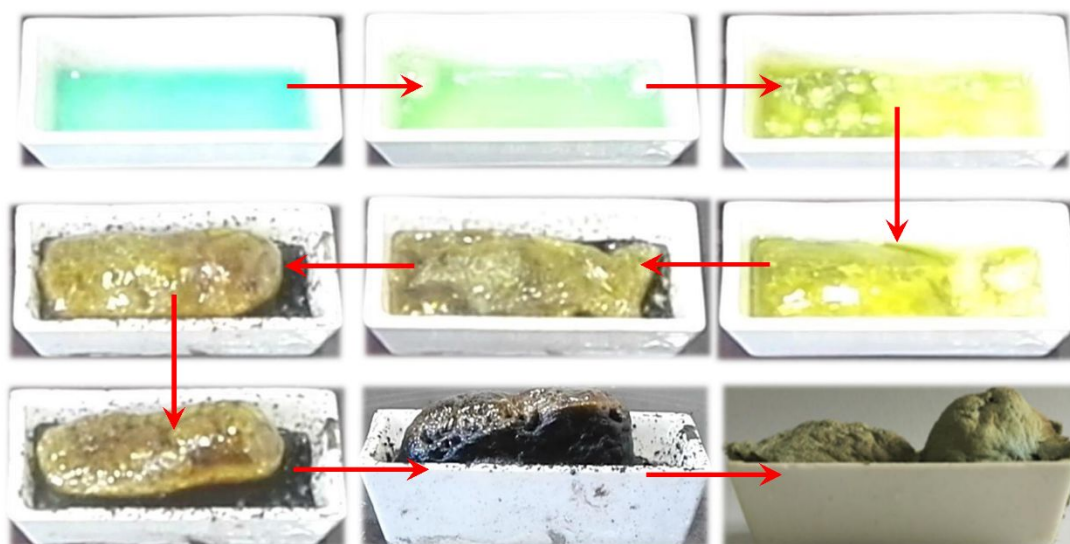

**Figure S1.** The series of changes of the mixed solution during the preparation process of the 2D NiO porous nanosheets.

---

\* Corresponding author at: Guangxi Key Laboratory of Electrochemical and Magneto-chemical Functional Materials, College of Chemistry and Bioengineering, Guilin University of Technology, Guilin 541004, China

E-mail address: [lywhit@126.com](mailto:lywhit@126.com) (Y. Li); [yaojinhuan@126.com](mailto:yaojinhuan@126.com) (J. Yao)

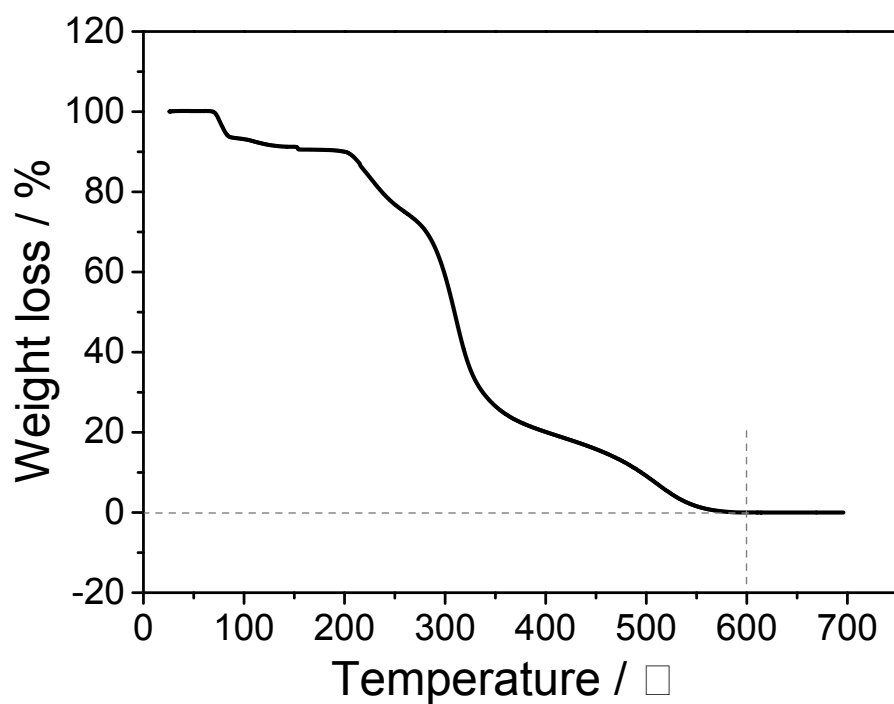

**Figure S2.** TGA plot of glucose heated in air atmosphere.

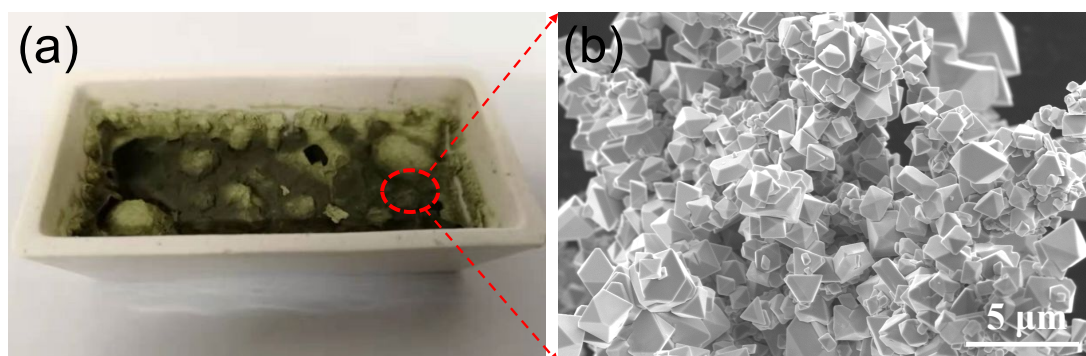

**Figure S3.** (a) The photo and (b) SEM image of the products with the same reaction conditions as that of 2D NiO porous nanosheets except the use of 0 mg of glucose.

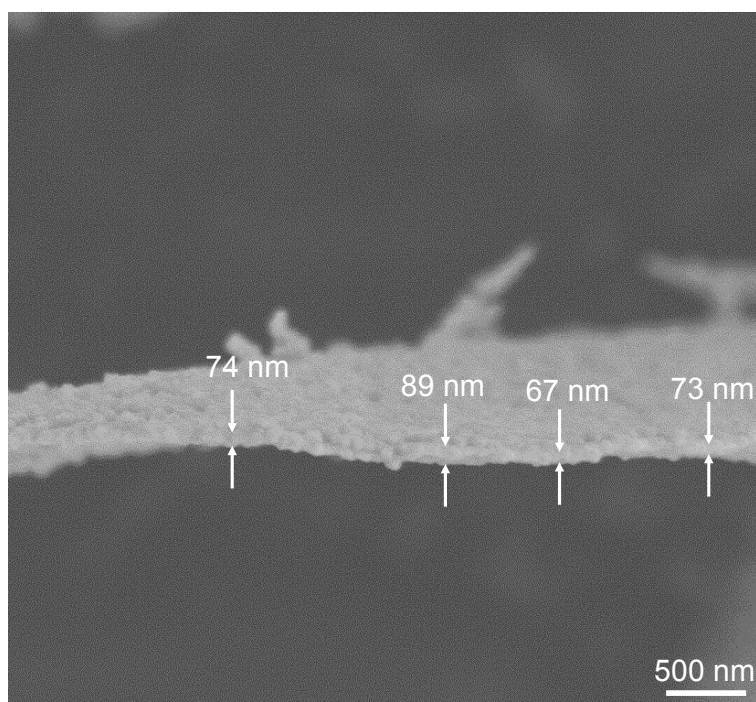

**Figure S4.** SEM image of 2D NiO porous nanosheets.

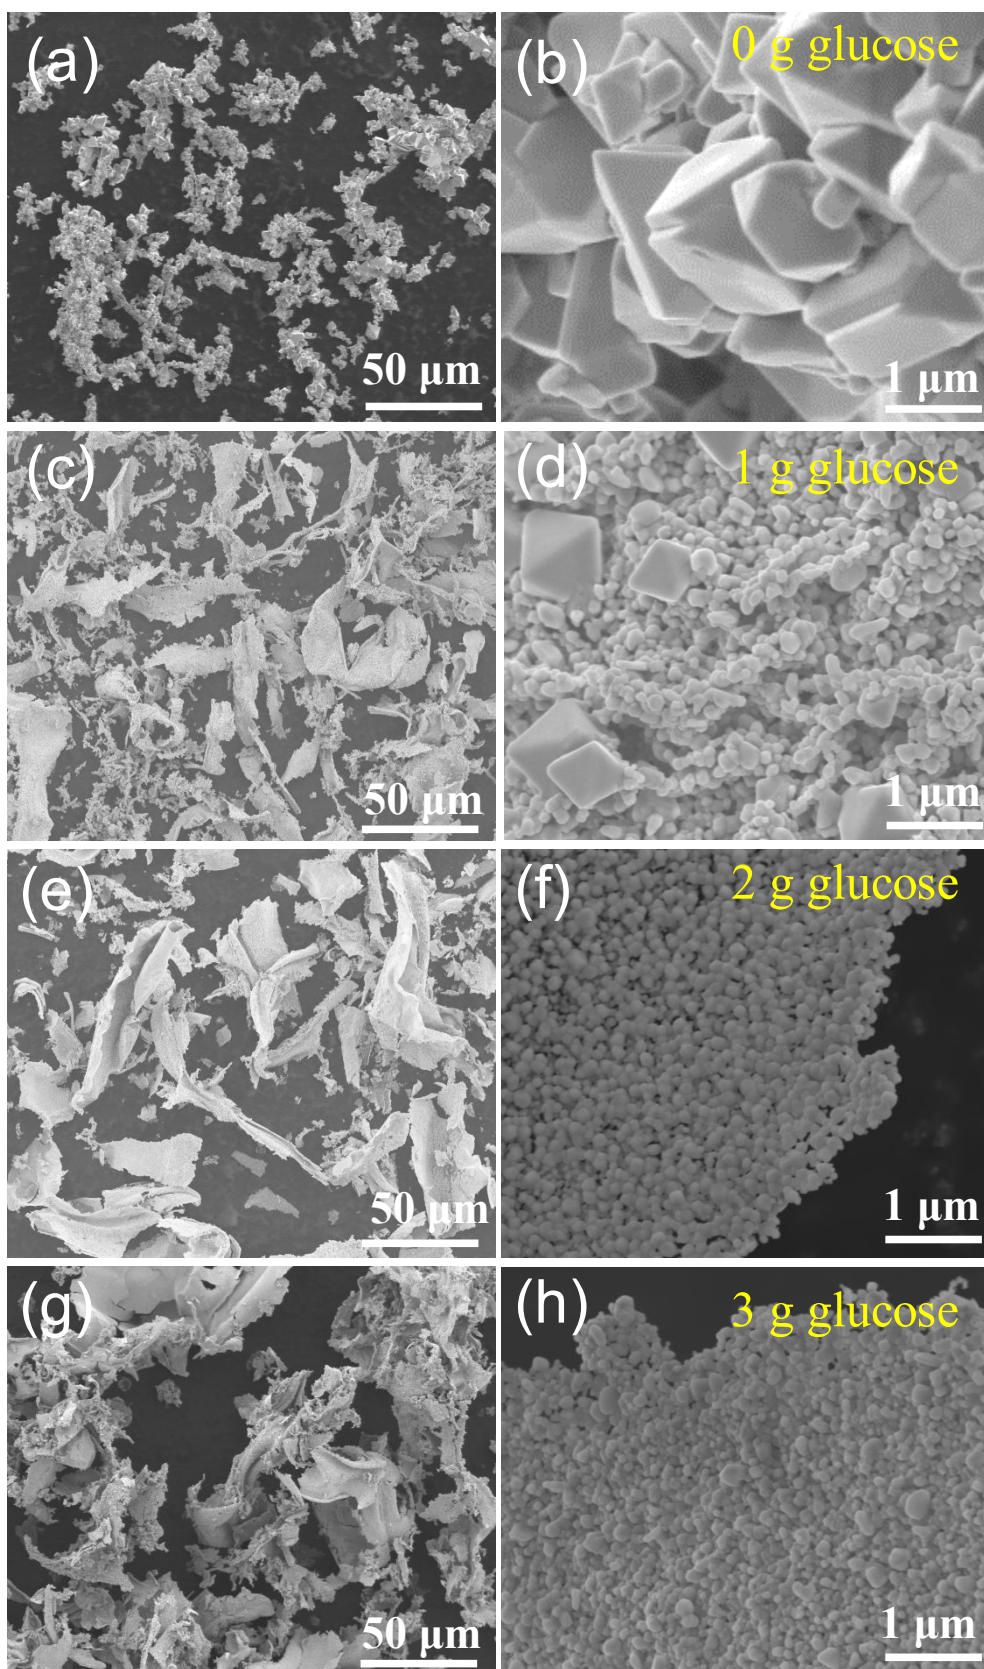

**Figure S5.** SEM images of the NiO samples prepared with (a, b) 2.0 g  $\text{NiCl}_2 \cdot 6\text{H}_2\text{O}$  and 0 g glucose, (c, d) 2.0 g  $\text{NiCl}_2 \cdot 6\text{H}_2\text{O}$  and 1.0 g glucose, (e, f) 2.0 g  $\text{NiCl}_2 \cdot 6\text{H}_2\text{O}$  and 2.0 g glucose, (g, h) 2.0 g  $\text{NiCl}_2 \cdot 6\text{H}_2\text{O}$  and 3.0 g glucose.

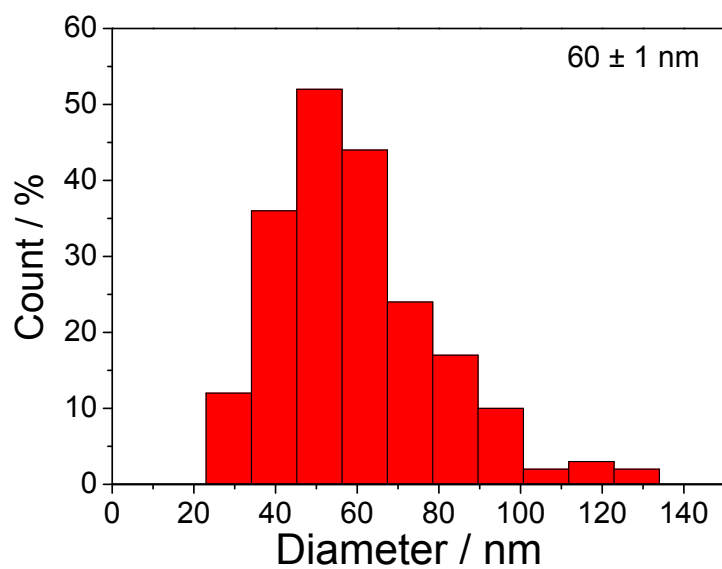

**Figure S6.** The statistics of particle distribution of the 2D NiO porous nanosheets.

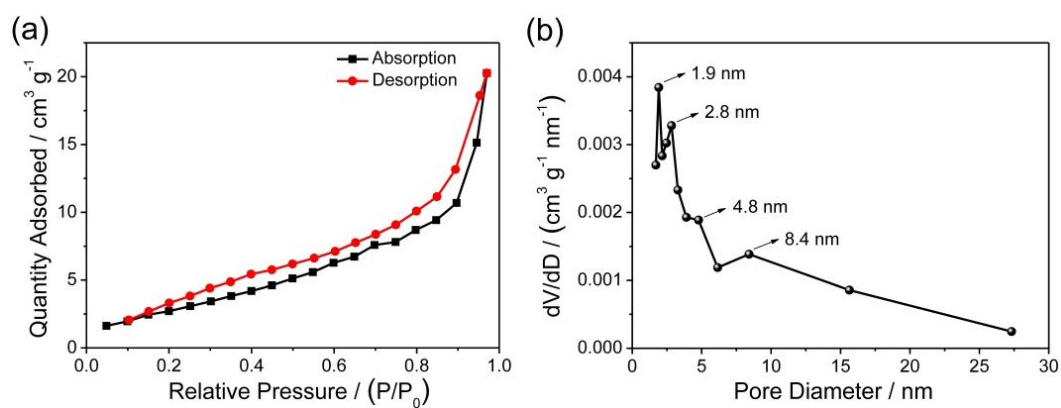

**Figure S7.** (a) Nitrogen sorption isotherms and (b) pore size distribution of the 2D NiO porous nanosheets sample.

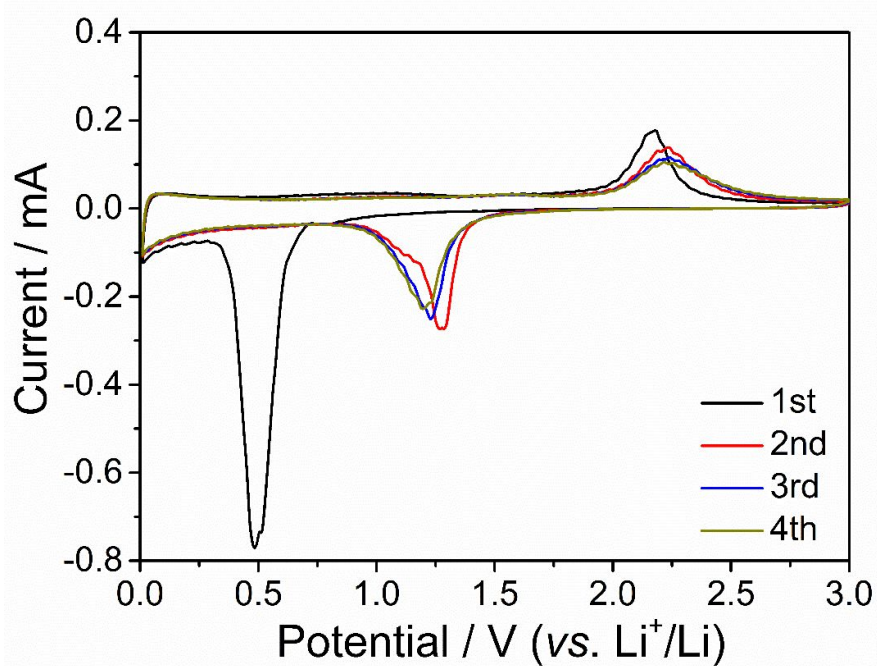

**Figure S8.** CV curves at  $0.1 \text{ mV s}^{-1}$  of the micro-sized NiO polyhedrons.

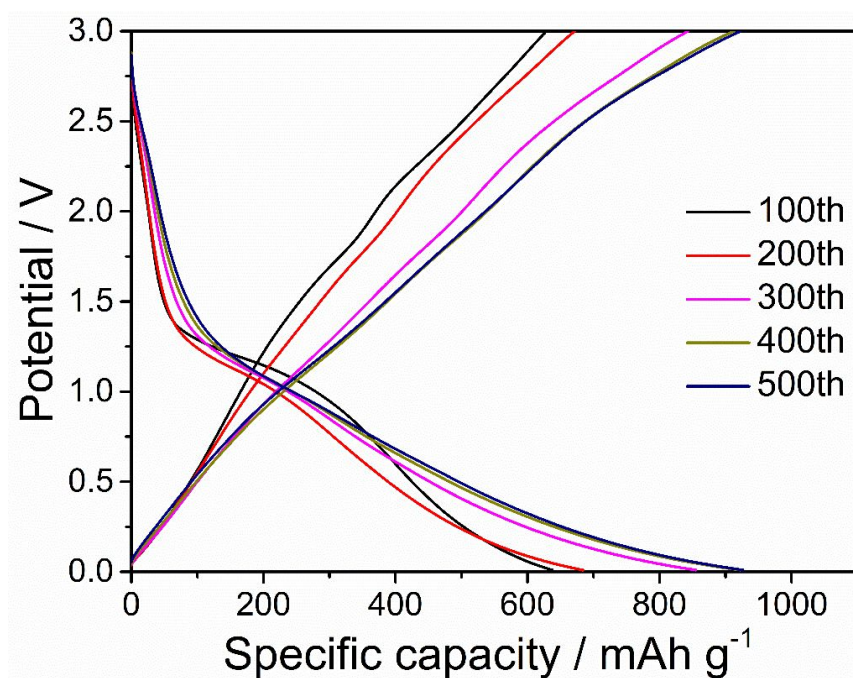

**Figure S9.** the charge/discharge voltage profiles for the 100<sup>th</sup>, 200<sup>th</sup>, 300<sup>th</sup>, 400<sup>th</sup> and 500<sup>th</sup> cycle at 1000  $\text{mA} \cdot \text{g}^{-1}$  of the 2D NiO porous nanosheets.

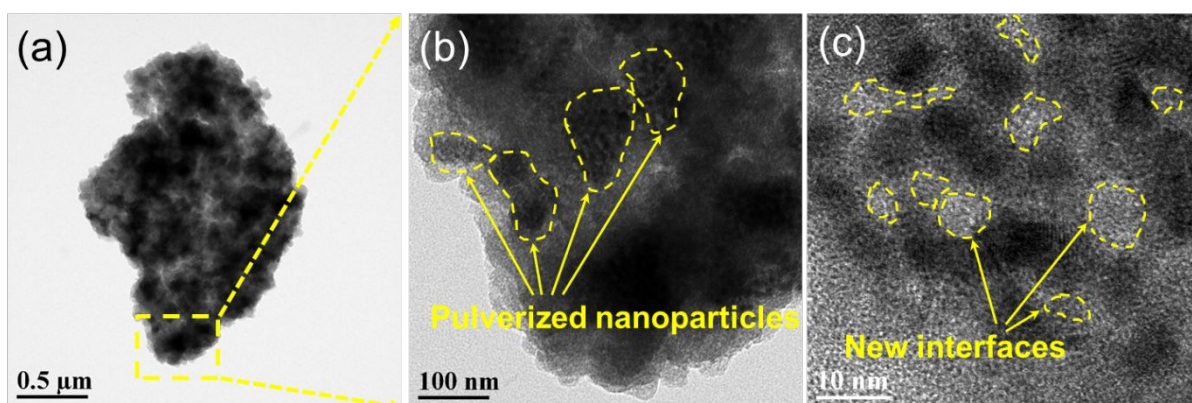

**Figure S10.** (a, b, c) TEM images of the 2D NiO porous nanosheets after 500 cycles at 1 A g<sup>-1</sup>.

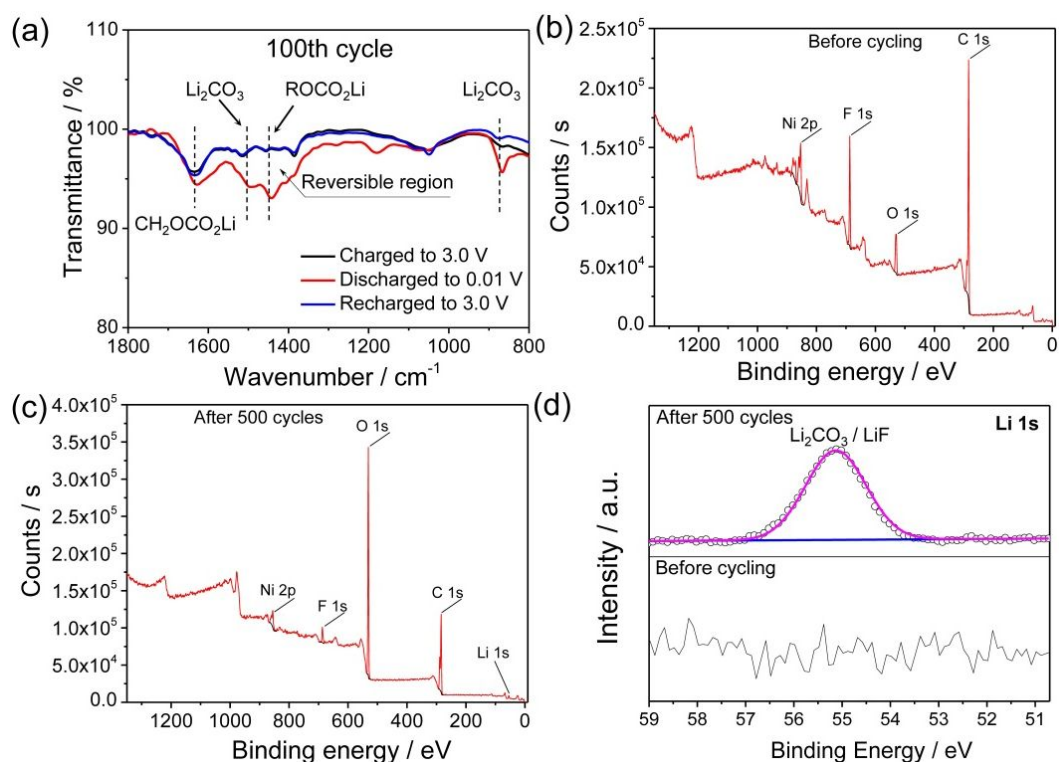

**Figure S11.** The FTIR spectroscopy of the 2D NiO porous nanosheets electrode at different charge/discharge potentials during the 100th cycle. XPS survey spectra of the 2D NiO porous nanosheets electrode (b) before cycling, (c) after 500 cycles. (d) Li 1s XPS spectra of the 2D NiO porous nanosheets electrode before cycling and after 500 cycles.

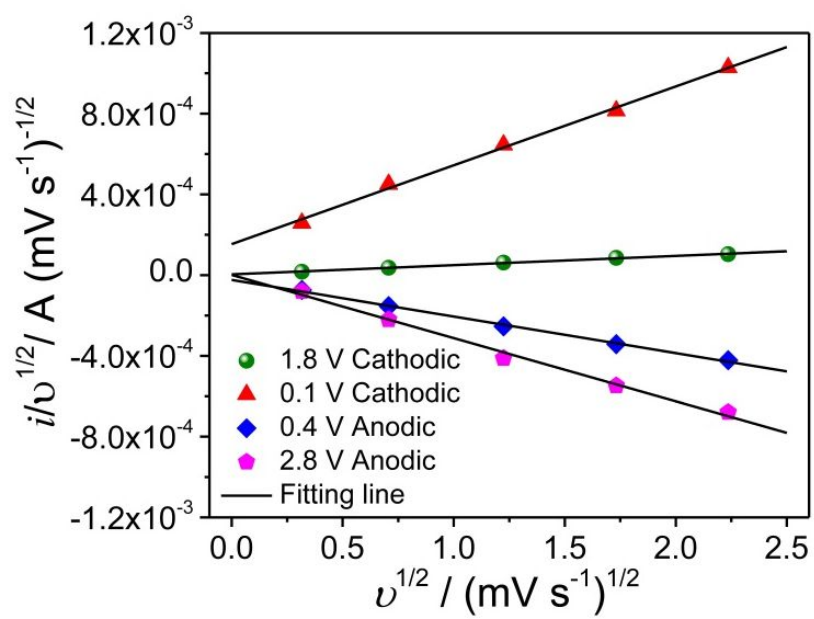

**Figure S12.** The fitted lines of  $i(V)/v^{1/2}$  vs  $i/v^{1/2}$  at different voltage (1.8 V, 0.1 V for cathodic scan and 0.4 V, 2.8 V for anodic scan).
